# Supplementary material
Source: PubMed Central journal article supplement (PMC4303018)
Supplement: Supp_Figure1.pdf [file Supp_Figure1.pdf]

## Supplementary Data

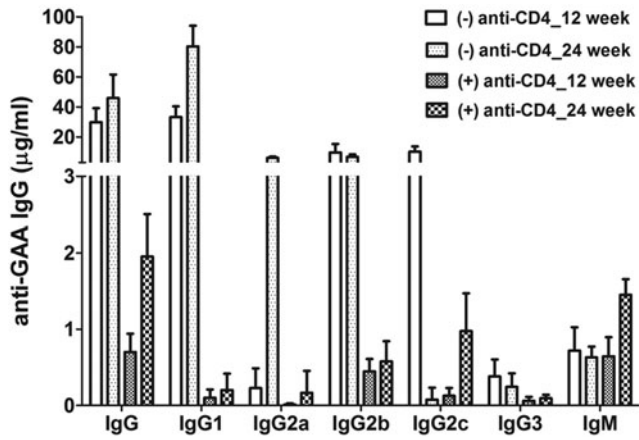

**SUPPLEMENTARY FIG. S1.** Anti-GAA antibody formation was sustained for 24 weeks following vector administration. Anti-GAA isotyping at weeks 12 and 24 following vector administration. GAA,  $\alpha$ -glucosidase.
