# Supplementary material
Source: PubMed Central journal article supplement (PMC4303018)
Supplement: Supp_Figure2.pdf [file Supp_Figure2.pdf]

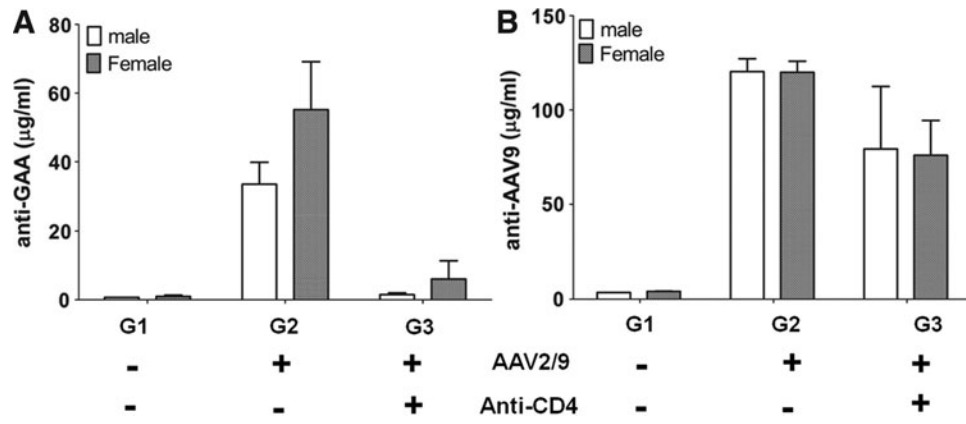

**SUPPLEMENTARY FIG. S2.** Males and females formed antibodies with similar efficiencies. IgG quantification at week 24 for mice in G1, G2, and G4. **(A)** Anti-GAA. **(B)** Anti-AAV9. AAV, adeno-associated virus.
